# Supplementary material
Source: MDPI journal article supplement (https://www.mdpi.com/2071-1050/13/18/10291)
Supplement: s1 [file s1]

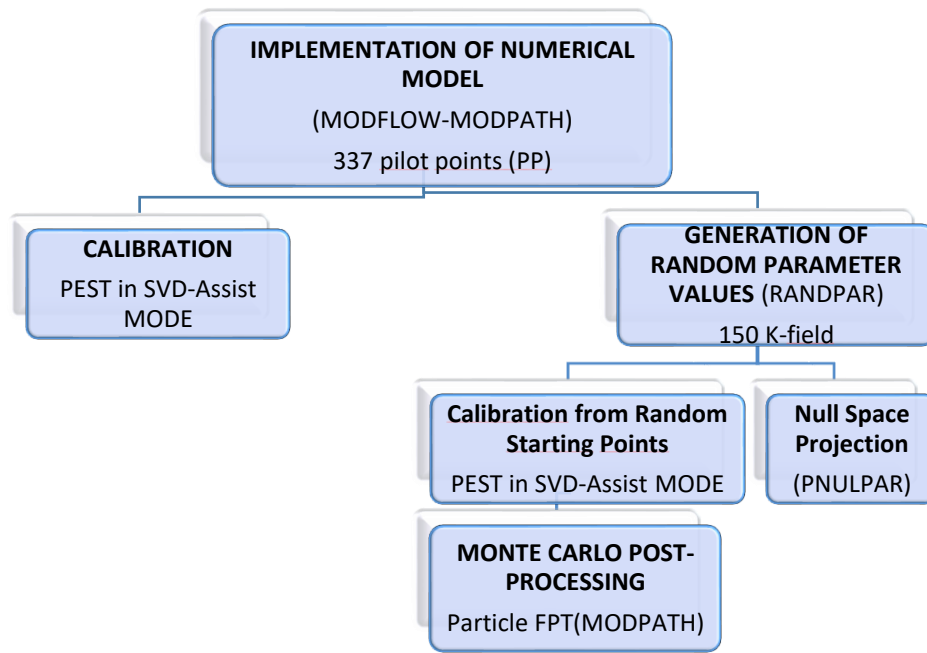

**Figure S1.** Flow diagram of the Null-Space Monte Carlo methodology.

**Table S1.** Summary of the modelled parameters (initial and after calibration) of the numerical model implemented for Site 2.

|                                                 | Regional model (m/s)  |                       |                       |                       | Local model (m/s)     |                       |                       |                       |
|-------------------------------------------------|-----------------------|-----------------------|-----------------------|-----------------------|-----------------------|-----------------------|-----------------------|-----------------------|
|                                                 | Initial<br>min        | Initial<br>max        | Calibrated<br>min     | Calibrated<br>max     | Initial<br>min        | Initial<br>max        | Calibrated<br>min     | Calibrated<br>Max     |
| Horizontal hydraulic conductivity               | $7.00 \times 10^{-5}$ | $8.80 \times 10^{-4}$ | $4.20 \times 10^{-6}$ | $2.50 \times 10^{-4}$ | $3.00 \times 10^{-4}$ | $3.00 \times 10^{-4}$ | $1.00 \times 10^{-7}$ | $1.20 \times 10^{-4}$ |
| Vertical hydraulic conductivity                 | $7.00 \times 10^{-6}$ | $8.80 \times 10^{-5}$ | $4.20 \times 10^{-7}$ | $2.50 \times 10^{-5}$ | $3.00 \times 10^{-5}$ | $3.00 \times 10^{-5}$ | $1.00 \times 10^{-8}$ | $1.20 \times 10^{-5}$ |
| Recharge                                        | $1.00 \times 10^{-9}$ | $8.00 \times 10^{-9}$ | $2.50 \times 10^{-9}$ | $9.00 \times 10^{-9}$ | $6.00 \times 10^{-9}$ | $6.00 \times 10^{-9}$ | $2.00 \times 10^{-9}$ | $2.50 \times 10^{-9}$ |
| Vertical conductivity of bottom river sediments | $6.00 \times 10^{-5}$ | $6.00 \times 10^{-3}$ | $4.00 \times 10^{-6}$ | $6.50 \times 10^{-4}$ | $5.00 \times 10^{-7}$ | $4.50 \times 10^{-4}$ | $5.00 \times 10^{-6}$ | $6.50 \times 10^{-5}$ |

**Table S2.** Mass balance of the Site 2 models [m<sup>3</sup>/s].

|               | Regional    |            | Local       |             |
|---------------|-------------|------------|-------------|-------------|
|               | Inflows     | Outflows   | Inflows     | Outflows    |
| Well          |             | 0.31 (12%) |             | 0.015 (15%) |
| GHB           | 0.69 (26%)  | 0.09 (3%)  | 0.045 (46%) | 0.009 (9%)  |
| River         | 0.22 (8%)   | 1.74 (66%) | 0.021(22%)  | 0.052 (54%) |
| Drain         |             | 0.51 (19%) |             | 0.021 (22%) |
| Recharge      | 1.74 (66%)  |            | 0.031(32%)  |             |
| TOTAL         | 2.65 (100%) | 2.65(100%) | 0.097(100%) | 0.097(100%) |
| Percent error |             | -0.0000028 |             | -0.00023    |

**Table S3.** Summary of the main characteristics of the Site 1 numerical model.

| Pilot Area (395 km <sup>2</sup> ) |                                                                                             |
|-----------------------------------|---------------------------------------------------------------------------------------------|
| Grid                              | 210 R – 88 C (100 m x 100 m)                                                                |
| Active cell                       | 355.320                                                                                     |
| Layer                             | 9 (1 to 2 representing the Aquifer A, from 3 to 9 representing the semi-confined Aquifer B) |

|                        |                                                                     |
|------------------------|---------------------------------------------------------------------|
| CH                     | Water Table m a.s.l. (Colombo et al., 2019)                         |
| River                  | Villoresi, Olona and Seveso with RIV Package (Colombo et al., 2019) |
| Hydraulic conductivity | Aquifer A: $1 \cdot 10^{-5}$ and $4 \cdot 10^{-3}$ m/s              |
|                        | Aquifer B: $1 \cdot 10^{-5}$ and $1.4 \cdot 10^{-3}$ m/s.           |
| Target                 | 63                                                                  |
